# Supplementary material
Source: PubMed Central journal article supplement (PMC5042105)
Supplement: BJO-123-1489-s001.pdf [file BJO-123-1489-s001.pdf]

**Table S1.** Countries used in calculations of regional and global estimates, in Singh 2006 and in present study.

| <b>Singh 2006* (reference year 2005)</b> | <b>Present study (reference year 2012)</b>                                             |
|------------------------------------------|----------------------------------------------------------------------------------------|
| <b>AFRICA</b>                            |                                                                                        |
| Egypt, 1996†                             | Burkina Faso, 2008<br>Ethiopia, 2008<br>Kenya, 2012<br>Malawi, 2009<br>Mauritius, 2012 |
| Nigeria, 1996                            | Nigeria, 2012<br>Rwanda, 2009<br>Senegal, 2012<br>Tanzania, 2013                       |
| Uganda, 2002                             | Uganda, 2013                                                                           |
| <b>ASIA</b>                              |                                                                                        |
| Bangladesh, 1995†                        | Bangladesh, 2010<br>Cambodia, 2010<br>Myanmar, 2009                                    |
| Pakistan, 2002†                          | Pakistan, 2012                                                                         |
| Phillippines, 2000                       | Philippines, 2000<br>Sri Lanka, 2010                                                   |
| <b>LATIN AMERICA AND THE CARIBBEAN</b>   |                                                                                        |
|                                          | Argentina, 2010                                                                        |
| Brazil, 1991                             | Brazil, 2012                                                                           |
| Chile, 1990                              | Chile, 2011                                                                            |
| Colombia, 1989                           | Colombia, 2008<br>Costa Rica, 2012                                                     |
| Dominican Republic, 1990                 | Dominican Republic, 2012                                                               |
| Guatemala, 2003                          | Guatemala, 2003                                                                        |
| Mexico, 1990                             | Mexico, 2009                                                                           |
| Peru, 1998                               | Peru, 2013<br>Venezuela, 2011                                                          |

\* See reference 7.

†Did not include complications treated in the private sector.
